# Supplementary material for: Membrane binding properties of the cytoskeletal protein bactofilin
Source: eLife. 2025 Sep 19;13:RP100749. doi: 10.7554/eLife.100749 (PMC12448750; doi:10.7554/eLife.100749)
Supplement: Source data 1. — This file contains source data for Figures 3 and 4B, Figure 4—figure supplement 1C, Figure 8—figure supplement 4. [file elife-100749-data1.xlsx]

## Sheet: Figures 3 & 4B
Statistics of band intensity (%)									Raw co-sedimentation data
BacA variant	Liposomes	Fraction	n	Mean	Std	Min	Max		BacA variants	Liposomes	Replicate	Fraction	Raw band intensity	Band area (%)
WT	+	supernatant	3	0.208205	0.0788504	0.117541	0.260779		WT	+	1	supernatant	8179.87	0.246294
		pellet	3	0.791795	0.0788504	0.739221	0.882459					pellet	25031.9	0.753706
	-	supernatant	3	0.782649	0.0344095	0.74293	0.803422				2	supernatant	5156.2	0.260779
		pellet	3	0.217351	0.0344095	0.196578	0.25707					pellet	14616.1	0.739221
Δ2-8	+	supernatant	3	0.827028	0.051741	0.769086	0.868616				3	supernatant	1667.62	0.117541
		pellet	3	0.172972	0.051741	0.131384	0.230914					pellet	12519.9	0.882459
	-	supernatant	3	0.697563	0.0273581	0.666753	0.719011		WT	-	1	supernatant	7371.32	0.447785
		pellet	3	0.302437	0.0273581	0.280989	0.333247					pellet	1824.5	0.552215
F2Y	+	supernatant	3	0.469717	0.0114951	0.459237	0.482011				2	supernatant	9090.41	0.803422
		pellet	3	0.530283	0.0114951	0.517989	0.540763					pellet	2224.2	0.196578
	-	supernatant	3	0.735824	0.00993864	0.727107	0.746647				3	supernatant	5972.32	0.74293
		pellet	3	0.264176	0.00993864	0.253353	0.272893					pellet	2066.55	0.25707
K4S-K7S	+	supernatant	3	0.605262	0.0334453	0.572501	0.639352		Δ2-8	+	1	supernatant	19189.6	0.843381
		pellet	3	0.394738	0.0334453	0.360648	0.427499					pellet	3563.57	0.156619
	-	supernatant	3	0.775731	0.0140976	0.760285	0.787905				2	supernatant	14037.4	0.769086
		pellet	3	0.224269	0.0140976	0.212095	0.239715					pellet	4214.64	0.230914
F2E	+	supernatant	3	0.867272	0.0453684	0.815308	0.899005				3	supernatant	15161	0.868616
		pellet	3	0.132728	0.0453684	0.100995	0.184692					pellet	2293.2	0.131384
	-	supernatant	3	0.810515	0.0306647	0.778339	0.839404		Δ2-8	-	1	supernatant	7012.73	0.706924
		pellet	3	0.189485	0.0306647	0.160596	0.221661					pellet	2907.33	0.293076
K4E-K7E	+	supernatant	3	0.896839	0.0387128	0.852139	0.919608				2	supernatant	9428.68	0.666753
		pellet	3	0.103161	0.0387128	0.0803919	0.147861					pellet	4712.52	0.333247
	-	supernatant	3	0.850676	0.056395	0.787041	0.894467				3	supernatant	7657.37	0.719011
		pellet	3	0.149324	0.056395	0.105533	0.212959					pellet	2992.5	0.280989
F2E-K4E-K7E	+	supernatant	3	0.948623	0.0197404	0.927688	0.966899		F2Y	+	1	supernatant	18455.2	0.459237
		pellet	3	0.0513768	0.0197404	0.0331013	0.0723124					pellet	21731.5	0.540763
	-	supernatant	3	0.867918	0.0133075	0.854143	0.880703				2	supernatant	16719.6	0.467903
		pellet	3	0.132082	0.0133075	0.119297	0.145857					pellet	19013.4	0.532097
xE	+	supernatant	3	0.884257	0.0401632	0.837977	0.909986				3	supernatant	12193.3	0.482011
		pellet	3	0.115743	0.0401632	0.0900139	0.162023					pellet	13103.4	0.517989
	-	supernatant	3	0.843369	0.0146197	0.830049	0.859011		F2Y	-	1	supernatant	9567.63	0.727107
		pellet	3	0.156631	0.0146197	0.140989	0.169951					pellet	3590.86	0.272893
ΔM	+	supernatant	3	0.429622	0.0277972	0.403736	0.459				2	supernatant	13636.9	0.746647
		pellet	3	0.570378	0.0277972	0.541	0.596264					pellet	4627.28	0.253353
	-	supernatant	3	0.880525	0.0309852	0.85551	0.915186				3	supernatant	10932.7	0.733719
		pellet	3	0.119475	0.0309852	0.0848142	0.14449					pellet	3967.67	0.266281
F130R	+	supernatant	3	0.653962	0.0024405	0.652033	0.656705		K4S-K7S	+	1	supernatant	24349.3	0.639352
		pellet	3	0.346038	0.0024405	0.343295	0.347967					pellet	13735	0.360648
	-	supernatant	3	0.888057	0.0212205	0.863613	0.901756				2	supernatant	22818.3	0.572501
		pellet	3	0.111943	0.0212205	0.0982443	0.136387					pellet	17038.9	0.427499
											3	supernatant	18407.4	0.603932
												pellet	12071.9	0.396068
									K4S-K7S	-	1	supernatant	11967.5	0.779002
												pellet	3395.08	0.220998
											2	supernatant	15969.8	0.760285
												pellet	5035.23	0.239715
											3	supernatant	14307.3	0.787905
												pellet	3851.38	0.212095
									F2E	+	1	supernatant	22631.4	0.899005
												pellet	2542.45	0.100995
											2	supernatant	21475.3	0.815308
												pellet	4864.81	0.184692
											3	supernatant	16214.1	0.887505
												pellet	2055.2	0.112495
									F2E	-	1	supernatant	10503	0.813802
												pellet	2403.08	0.186198
											2	supernatant	10961.9	0.839404
												pellet	2097.26	0.160596
											3	supernatant	9589.92	0.778339
												pellet	2731.08	0.221661
									K4E-K7E	+	1	supernatant	15541.5	0.918768
												pellet	1374.08	0.0812318
											2	supernatant	15629.5	0.852139
												pellet	2711.98	0.147861
											3	supernatant	9954.09	0.919608
												pellet	870.184	0.0803919
									K4E-K7E	-	1	supernatant	7711.36	0.787041
												pellet	2086.55	0.212959
											2	supernatant	16097.2	0.894467
												pellet	1899.2	0.105533
											3	supernatant	10298.8	0.870519
												pellet	1531.84	0.129481
									F2E-K4E-K7E	+	1	supernatant	23471.2	0.966899
												pellet	803.527	0.0331013
											2	supernatant	25733.6	0.927688
												pellet	2005.91	0.0723124
											3	supernatant	14356.8	0.951283
												pellet	735.234	0.0487166
									F2E-K4E-K7E	-	1	supernatant	9640.83	0.854143
												pellet	1646.31	0.145857
											2	supernatant	12913.4	0.880703
												pellet	1749.2	0.119297
											3	supernatant	11055.2	0.868908
												pellet	1667.89	0.131092
									xE	+	1	supernatant	22029	0.904807
												pellet	2317.62	0.0951927
											2	supernatant	20911.4	0.837977
												pellet	4043.22	0.162023
											3	supernatant	13903	0.909986
												pellet	1375.26	0.0900139
									xE	-	1	supernatant	7865.97	0.830049
												pellet	1610.55	0.169951
											2	supernatant	11201.8	0.859011
												pellet	1838.55	0.140989
											3	supernatant	8879.05	0.841049
												pellet	1678.06	0.158951
									ΔM	+	1	supernatant	12492.9	0.459
												pellet	14724.7	0.541
											2	supernatant	8318.09	0.403736
												pellet	12284.7	0.596264
											3	supernatant	5431.59	0.426129
												pellet	7314.77	0.573871
									ΔM	-	1	supernatant	8030.56	0.85551
												pellet	1356.31	0.14449
											2	supernatant	9594.19	0.870878
												pellet	1422.5	0.129122
											3	supernatant	7241.63	0.915186
												pellet	671.113	0.0848142
									F130R	+	1	supernatant	25287.8	0.656705
												pellet	13219.3	0.343295
											2	supernatant	25621.7	0.652033
												pellet	13673.4	0.347967
											3	supernatant	20553.6	0.653146
												pellet	10915	0.346854
									F130R	-	1	supernatant	14952.7	0.863613
												pellet	2361.43	0.136387
											2	supernatant	22286.7	0.901756
												pellet	2428.08	0.0982443
											3	supernatant	18977.5	0.898802
												pellet	2136.72	0.101198

## Sheet: Figure 4-figure supplement 1C
Statistics of band intensity (%)								Raw fractionation data
Variants	Fraction	n	Mean	Std	Min	Max		Variant	Replicate	Fraction	Raw band intensity	Band area (%)
WT	soluble	3	0.452214	0.24154	0.175645	0.621711		WT	1	soluble	7430.64	0.621711
	pellet	3	0.547786	0.24154	0.378289	0.824355				pellet	4521.28	0.378289
ΔN27	soluble	3	0.81434	0.0653427	0.747907	0.878535			2	soluble	5040.61	0.559284
	pellet	3	0.18566	0.0653427	0.121465	0.252093				pellet	3972	0.440716
BacACreS	soluble	3	0.589379	0.0763218	0.501671	0.640686			3	soluble	2141.74	0.175645
	pellet	3	0.410621	0.0763218	0.359314	0.498329				pellet	10051.8	0.824355
								ΔN27	1	soluble	8360.3	0.747907
										pellet	2817.96	0.252093
									2	soluble	14020.4	0.878535
										pellet	1938.45	0.121465
									3	soluble	17750.7	0.816578
										pellet	3987.22	0.183422
								BacACreS	1	soluble	8239.66	0.501671
										pellet	8184.76	0.498329
									2	soluble	12103.3	0.62578
										pellet	7237.83	0.37422
									3	soluble	11649.9	0.640686
										pellet	6533.59	0.359314

## Sheet: Figure 8-figure supplement 4
Stalk length (µm) after 24 h of phosphate starvation
WT	LY71	LY75	LY76
1.12496	0.665772	2.39193	0.638848
0.784192	1.71039	2.70116	0.746543
8.2595	0.719619	0.784619	0.903467
0.600772	1.04462	1.28231	1.09804
0.876543	2.72766	3.47882	0.658384
3.79963	6.44965	1.29723	0.481924
1.42347	0.589619	4.68271	4.42037
0.979192	0.600772	2.33347	0.508848
1.27074	1.23223	1.31996	1.80231
1.74946	2.01223	1.13654	4.38605
2.7754	0.52	0.589192	0.481924
0.681543	6.85605	0.443848	0.627696
2.34924	0.806924	1.84835	0.325
1.76381	7.25849	0.481924	1.15189
1.38077	0.470772	0.83804	3.96408
5.95344	1.35385	0.616116	0.340772
7.79021	4.32759	0.524192	8.67599
2.71793	3.49651	0.979619	3.09955
2.548	0.638848	3.2792	0.941116
0.730772	1.1477	4.53978	3.3604
0.340772	1.00612	5.90926	3.22074
3.42497	0.914192	9.06194	4.92921
0.378848	4.86193	8.62449	1.55723
1.4695	1.74847	2.99271	1.0177
0.903467	9.25503	0.799964	0.535772
2.19693	2.62039	3.19424	5.27843
4.08336	2.83578	8.5315	0.340772
2.07347	1.41231	0.497696	0.351924
1.69924	2.16077	1.12539	2.17001
5.37811	1.43419	2.44493	4.39578
9.13561	5.86805	3.39066	5.63917
1.38539	1.48847	1.46993	0.508848
1.15885	0.443848	0.654619	3.52194
3.13805	1.74847	2.50759	5.26594
0.795772	0.772613	6.35225	3.27772
0.443848	0.497268	4.09266	0.638848
0.95646	0.815308	0.627696	3.34272
4.53459	1.22385	4.46455	6.29521
3.14558	1.93231	0.508848	5.03839
1.89381	0.600772	1.70996	1.21731
1.5377	1.02189	3.70309	3.95847
7.54741	0.979619	4.9658	3.9719
0.627696	2.92962	0.378848	0.795772
4.40693	1.47731	5.91771	0.638848
0.707613	1.48847	1.87804	0.497268
1.88685	0.665772	7.06428	4.23041
0.367268	0.838467	4.54212	1.51077
0.443848	0.925772	1.21227	5.22871
0.654619	2.59809	2.28147	6.81336
0.757696	3.56336	1.45458	7.41037
1.768	0.768848	3.8642	7.19959
8.70163	1.0177	8.37798	7.68614
1.43924	0.470772	6.95068	2.27771
2.97374	1.0827	5.51102	2.18116
2.44074	4.46697	2.18116	1.30924
6.5452	3.33348	7.60197	1.95924
8.45968	5.96459	1.03347	2.82001
4.71162	2.22805	0.562696	2.27728
1.80608	0.340772	1.6677	5.06617
2.66771	0.535772	1.07154	6.0659
0.546924	4.20349	0.562696	5.92418
1.768	3.97694	4.07455	9.05698
1.45458	1.99731	3.95002	0.784192
1.21731	0.481924	2.60228	7.37038
1.35847	4.70963	2.33809	4.64648
2.23501	1.2127	0.941543	1.22847
4.61913	1.77958	2.47271	0.340772
5.02156	1.22804	0.508848	0.378848
1.33574	1.64539	5.30344	2.77035
3.13762	0.562696	5.50029	2.36039
1.28189	5.15128	8.6973	0.508848
2.71651	1.74847	8.19413	6.2761
5.32426	6.44233	0.627696	2.62963
2.21228	2.68077	0.811543	1.03347
1.75266	1.02189	3.65386	3.98724
0.535772	0.806924	3.78024	1.98154
5.13579	4.45616	6.58618	1.88223
1.35847	2.97231	0.876543	0.351924
0.481924	2.17192	0.455	2.87848
4.71333	1.12077	6.22374	5.57431
1.43462	0.508848	7.33081	7.33421
1.13654	3.36693	8.11841	3.26386
0.719619	1.32039	5.86614	1.69462
1.35804	3.96685	7.62427	6.42464
2.9319	0.535772	6.54619	0.546924
1.38539	0.692696	0.535772	6.42655
3.21797	2.4872	1.52654	1.68347
1.58416	1.87804	3.91386	3.43002
2.52946	0.611924	9.03211	7.63691
1.64539	0.497696	2.26193	4.81924
2.90078	1.51077	6.32071	4.63447
0.589192	0.443848	8.48313	3.31117
3.27729	0.746116	8.42466	4.13849
4.53893	5.76959	2.45608	8.20003
1.51539	7.87603	0.941543	7.19497
1.07154	0.470772	1.12496	4.05039
0.546924	1.48108	4.38001	1.05996
2.19231	1.07154	3.66039	4.66978
5.78494	0.703848	1.16347	5.46037
2.08228	1.0827	0.692696	3.99734
0.914619	3.95946	4.2807	5.54724
0.508848	0.822268	0.329192	5.40965
1.34731	5.7654	5.73465	0.799964
1.91335	1.29347	2.57578	1.62309
1.26654	3.78024	4.57558	1.72993
1.84501	0.573848	4.03228	9.39313
0.481924	4.54809	0.52	1.76424
4.27225	1.85154	3.64079	8.25807
6.05098	1.83996	1.43462	6.80967
0.849192	0.627696	8.15542	7.93769
0.692696	5.0992	0.757696	7.28079
0.470772	0.546924	2.18116	8.48753
2.09343	5.02156	1.76843	1.54231
4.05687	4.2552	1.95462	6.8935
4.25691	2.42958	1.64958	0.573848
3.72724	4.15674	0.367268	0.443848
3.29874	0.470772	1.49266	4.31501
3.75836	4.96281	0.741924	4.60926
0.497268	1.77539	0.799537	3.57309
5.17721	2.52193	3.4031	3.89155
1.1477	4.93809	5.6423	6.31652
4.58759	1.41231	1.92074	4.48537
0.600772	1.49962	4.58616	5.89455
1.42347	0.96804	3.48116	0.654192
1.24381	1.02189	6.37684	0.539537
0.768848	1.45458	1.82924	5.66566
2.59809	1.62266	5.2258	7.99956
0.692696	2.67886	2.94639	2.95463
2.66685	2.06231	4.02951	0.784619
7.75384	1.70577	8.81196	7.53426
1.69924	3.9942	4.5324	2.59155
3.25733	2.60924	0.535772	0.853384
0.481924	1.00612	3.66963	8.03657
0.903467	1.33154	3.50532	1.38496
8.94395	1.74193	3.57579	4.49986
7.38196	0.757696	3.12981	6.88021
0.849192	6.23426	1.70577	5.27524
3.89632	2.8242	6.8481	4.77882
1.07154	0.481924	4.38734	5.39636
2.60604	3.58332	0.539537	4.11348
6.56125	4.66474	3.25924	2.9704
2.73981	1.15189	2.94767	4.18039
1.21689	1.05577	2.68348	8.57235
1.29809	1.78654	2.94916	7.34807
3.07071	8.5246	0.443848	3.08654
6.38762	1.59616	3.21925	3.28801
2.36963	0.990772	1.62223	4.7742
0.887696	3.00343	3.91656	6.47778
1.30462	4.50767	1.84458	0.627696
6.51437	1.82462	3.11617	2.92685
5.4019	2.72155	7.40575	2.72994
1.81809	0.573848	2.3854	2.97417
0.470772	0.77304	6.72542	0.57804
1.72574	5.27652	2.80886	1.70577
6.78538	0.665772	1.30881	1.21731
0.521285	1.63424	7.70504	0.676924
0.459619	4.54155	4.64463	6.65409
0.535772	2.96116	2.31116	6.38813
1.33154	1.99731	1.67693	5.55925
0.351924	1.22847	4.62694	3.85348
0.52	3.33682	8.3085	6.62255
2.18116	5.55243	2.14309	2.54104
4.2054	1.26654	1.29304	5.73003
2.68958	0.822696	1.81347	2.03539
0.329192	5.77464	0.524192	7.15222
3.09116	4.23694	0.768848	6.39118
2.49501	1.18577	6.02868	4.40502
5.94691	0.562696	2.98155	4.06382
3.57117	0.535772	2.86271	8.69368
1.74193	1.62266	1.77916	3.19886
0.470772	1.58039	3.04847	1.90958
1.22804	0.535772	4.19482	4.20917
8.86403	0.803729	2.34185	6.16926
0.600772	1.13654	1.17462	3.37809
3.11908	1.88309	2.35386	7.63925
3.41574	5.43997	2.61848	2.61386
1.83343	0.864964	0.600772	2.32288
1.13654	4.15255	3.19886	0.546924
5.29272	1.13654	5.38016	4.95443
0.329192	1.48193	6.21863	7.78091
1.60689	1.37338	1.67231	8.20571
0.443848	1.18996	2.81305	0.57804
0.784619	0.741924	1.05577	5.11874
0.432696	2.51455	8.80876	0.573848
0.638848	0.573848	0.83804	8.47552
2.01685	2.5777	2.20809	2.73733
1.12496	0.990772	5.72733	4.35117
1.00612	6.51927	1.22847	2.548
2.06189	6.51614	3.37766	4.87771
2.42348	1.76758	2.98809	8.77445
1.54231	1.1477	0.508848	3.6631
0.761888	0.876543	2.86228	5.70921
1.51539	0.573848	0.822696	8.06079
4.11348	0.654619	7.30076	6.15157
4.12648	3.39343	0.351924	5.13302
2.03958	1.6027	6.75845	7.90763
1.833	3.60939	2.79266	6.85095
7.0887	1.42347	1.29347	5.56301
5.03329	1.93693	1.93651	6.69388
0.665772	1.72616	4.06887	5.02305
0.378848	2.53266	4.13578	1.06039
1.51496	2.36501	1.10919	6.06767
2.90078	1.22847	1.41231	6.32867
3.20767	4.21193	2.89574	5.62525
0.455	1.47731	2.13527	5.22963
1.47731	1.69924	7.29927	8.94928
1.31996	1.87193	0.616543	0.665772
3.35301	2.93886	4.40311	5.7674
5.39998	0.455	1.75309	2.46809
0.903467	3.3869	4.61309	4.77839
1.19039	2.46155	3.50284	7.49675
1.38873	7.17118	3.71843	2.8019
0.849619	0.535772	4.39387	8.2168
2.34271	6.91643	5.44693	5.45155
1.92116	1.55809	0.340772	5.86571
2.15381	5.03463	2.69192	1.87151
1.55766	6.05312	1.97501	2.47647
3.85739	4.04152	4.49943	3.81078
1.79578	1.45039	1.07154	4.38229
1.31996	8.28925	6.21806	5.68748
2.39655	1.61847	1.9927	4.21002
1.01074	1.61847	0.914619	2.74343
5.13032	0.811116	4.3457	8.6811
1.68347	1.15885	0.52	4.97439
0.508848	0.768848	3.77924	1.638
2.74343	1.03304	7.89925	0.443848
3.61116	1.12539	1.12496	3.52805
3.09678	0.470772	3.01835	4.69848
3.30613	4.00955	1.94809	2.83535
7.89642	2.16958	4.02113	2.3692
8.86637	1.00654	3.19986	0.340772
4.69656	3.1595	7.52516	0.57804
1.23962	0.768848	0.546924	8.89692
2.65946	1.21731	8.50273	4.30066
8.83967	0.508848	6.60997	7.42799
4.20554	0.952696	9.07275	9.27357
1.37424	5.07541	4.50262	1.91654
0.535772	1.67885	2.79771	3.89994
2.32651	2.39655	0.784192	1.88771
0.589619	0.799537	6.6531	1.82924
5.75844	0.768848	2.08462	4.23652
1.65654	0.768848	5.37811	4.17848
1.89886	1.33154	4.93355	0.665772
2.08462	0.546924	1.21689	8.00418
0.455	0.757696	2.47924	1.67565
0.784192	5.33812	1.98154	1.71458
1.30838	2.12078	1.57577	8.22476
3.4254	1.63424	1.45039	4.42094
5.8606	3.47925	1.0177	5.91117
2.22762	3.30655	0.535772	4.07455
0.546924	4.79502	8.55196	6.75717
4.04194	0.83804	8.59294	0.611924
2.39655	0.600772	8.55487	4.00535
2.21228	5.82387	5.35729	4.21613
0.665772	1.06039	3.83408	1.85616
1.30881	5.50349	7.6308	3.82655
0.481924	8.9112	4.82656	7.0041
5.80533	0.968467	5.50554	4.89348
0.941543	1.11381	1.51077	2.33027
2.93147	0.849619	1.37758	6.51927
4.25272	0.898848	0.551116	3.1725
6.31694	1.2777	4.91578	5.05097
1.02189	3.59348	1.90539	3.19886
1.2777	0.730772	0.887696	2.36963
3.63155	0.808209	0.719619	3.46767
3.17293	3.64271	1.48847	6.21025
2.8019	2.07113	5.68882	0.378848
2.83535	2.98809	1.93885	2.8404
1.27074	3.25271	2.12731	2.52989
2.77078	0.535772	2.43654	2.40728
1.93693	1.67608	4.56251	3.77924
8.38359	0.562696	5.56635	3.96913
2.23963	5.07079	1.45458	2.98532
0.784619	6.47004	2.54424	6.54306
3.05728	1.75309	2.77917	4.0764
0.524192	6.66504	5.35118	2.56463
0.681116	2.72155	2.57116	1.56462
0.795772	0.627696	4.64143	2.31578
0.822696	2.59155	0.741924	0.481924
1.88266	1.51958	8.49349	2.27685
1.85154	0.638848	0.351924	1.93231
5.68371	0.941543	1.91378	4.12378
5.51855	1.69881	3.26386	0.600772
2.10501	1.71835	4.07917	0.876116
8.67308	0.508848	3.97147	0.562696
5.55414	0.340772	3.17847	1.59154
6.68145	2.66309	1.00654	5.82196
0.524192	5.88844	1.93885	1.13654
3.86839	0.838467	1.57996	3.64924
1.29766	1.7001	4.80426	1.16347
1.50424	1.0827	1.07154	1.55766
3.81683	4.71887	2.86271	2.90035
1.14074	1.32039	0.524192	6.69445
1.33154	1.87193	6.22964	2.11574
3.09997	0.757696	2.60185	4.20959
3.06609	1.67651	5.84298	1.11338
0.741924	1.30924	1.36962	3.96728
3.7769	1.67651	1.40074	0.367696
0.329192	2.47271	1.78654	0.600772
3.82193	2.83116	1.07154	2.86271
0.838467	0.914619	0.481924	2.49963
3.06233	2.61848	0.952696	2.00108
0.562696	2.39847	7.00964	5.44459
1.73035	1.84501	4.96786	1.69462
1.32039	0.443848	3.46958	1.69462
1.30924	1.72616	0.795772	2.87805
3.84652	7.29528	8.81949	0.975
4.86464	0.757268	4.59455	2.17001
0.589192	0.876543	1.04462	0.600772
5.5724	1.02146	3.78762	1.07112
0.508848	4.13806	1.09847	0.952696
0.455	2.10039	8.41272	1.41885
1.27074	0.611924	0.78	6.90614
2.36458	1.12496	0.378848	1.74847
1.32692	2.1092	4.0531	2.18578
2.08562	3.01501	4.98035	1.41189
1.34689	3.74025	3.93716	2.93886
1.41189	4.02155	1.7327	0.481924
0.481924	0.627696	1.27407	0.470772
1.39654	1.58039	1.61847	2.18116
0.730772	0.768848	2.54886	1.16723
6.59414	3.37617	2.33347	2.42958
2.07347	1.07154	4.33078	4.5802
2.27771	0.378848	2.4342	1.77958
0.968467	6.60025	1.59574	5.32717
1.33154	0.351924	1.92912	1.49309
1.63424	0.535772	0.979619	0.654619
0.508848	0.860772	0.849619	1.74847
1.00612	5.95196	0.546924	1.78001
0.589192	3.12462	0.497696	1.47209
2.36458	1.88962	4.88424	3.39109
1.64958	0.546924	8.10428	0.822696
5.05602	0.481924	1.85154	2.92771
3.08058	6.11747	2.65336	3.3442
6.05424	1.00654	7.14064	1.39654
1.04419	2.25078	4.09309	8.06413
3.35763	1.48804	1.03304	1.30924
1.43881	0.535772	1.15231	0.443848
2.88878	2.12731	1.07154	1.04462
0.351924	6.10575	0.351924	3.64604
7.37791	0.497696	0.546924	0.546924
6.65495	1.04881	5.68137	0.979619
2.02843	0.838467	0.443848	2.32693
0.876543	0.351924	1.59112	7.84306
2.53771	3.47272	1.00654	0.703848
1.08689	0.746116	7.14817	0.757696
2.54381	0.990772	0.481924	0.378848
2.52151	3.79501	0.968467	1.36223
3.51832	3.49183	2.44116	0.535772
2.73647	4.90329	5.19774	1.80231
1.43924	1.87847	3.849	1.30462
3.69336	0.443848	2.21185	2.87848
0.876543	2.27309	8.55906	1.47731
1.68809	7.29003	1.38539	1.66116
1.08689	2.4222	0.681543	1.07112
0.891888	0.849619	6.20371	1.40074
2.06331	0.481924	0.681543	3.21882
5.34571	0.57804	7.40483	2.48386
0.654192	4.12463	1.11381	3.07348
1.41231	3.02339	1.50424	1.61151
4.49041	2.09343	5.59236	1.02231
4.38605	7.22886	0.90304	1.99078
2.54104	1.61385	3.33348	5.20271
1.26654	0.340772	6.87836	0.481924
8.89096	0.757268	0.535772	7.10804
0.903467	0.979619	6.42735	1.17838
2.78989	3.01039	1.03347	2.41886
2.13151	1.0827	0.865391	3.6469
9.47085	2.25731	1.24424	0.56646
0.497268	1.12539	0.589619	2.08981
0.757696	0.795772	6.57503	3.85305
7.72429	1.05577	4.36843	8.58364
5.70793	5.38655	5.54213	5.62291
0.351924	0.351924	0.535344	2.7207
0.535772	0.952696	1.57386	8.23406
6.88383	1.35847	5.82196	4.26025
0.746116	1.99671	0.616116	0.329192
2.38078	0.562696	8.37102	4.39116
5.91722	4.65535	0.481924	8.52468
5.27347	3.05366	5.32155	5.97398
0.470772	0.351924	5.02724	8.96668
0.551116	5.58632	3.50951	5.1387
1.42347	1.92116	3.43336	0.784619
5.59598	6.30075	8.35966	3.42178
1.81027	0.508848	0.455	2.9481
3.3707	0.891888	5.04116	5.72555
2.34881	4.87309	0.681116	0.329192
1.09804	3.88645	5.80966	0.351924
1.04881	3.05309	6.83517	6.32889
3.28382	1.29347	3.6042	9.50892
0.784192	0.470772	7.60779	1.30924
8.02095	0.627696	1.67651	4.81647
5.84163	1.68766	2.36139	4.59874
7.07663	1.04419	4.24867	4.97382
0.481924	3.3057	2.42682	0.768848
0.822696	3.11155	3.70728	7.06811
0.616116	0.494361	3.22635	8.6161
2.38497	0.351924	0.562268	3.08378
1.78001	1.17462	0.703848	0.340772
0.546924	1.12539	3.51924	5.78579
0.681543	7.97455	9.10173	2.83116
2.743	1.12916	4.20135	4.7031
4.46278	2.08185	3.36502	3.08101
1.54231	5.18964	0.968467	3.52343
4.13116	0.768848	0.773467	1.66535
0.871924	4.4269	8.38488	8.09887
5.01986	0.719619	4.1019	0.746543
0.806924	1.03304	4.49886	0.329192
1.82881	0.589192	8.41272	8.95176
3.07724	0.811543	4.16832	4.24171
2.56001	6.95771	4.40374	1.89424
6.84185	1.81347	3.02616	7.47083
0.811116	4.32944	0.508848	0.589619
2.09343	1.99689	6.56579	3.86286
0.340772	0.898848	3.86101	7.0492
2.158		1.98574	0.351924
4.94079		5.79652	5.05417
1.06692		0.665772	0.508848
4.48956		2.98994	3.80482
0.535772		2.77731	3.98867
6.57603		9.13199	1.84458
1.47731		0.589619	6.9563
0.665772		8.42615	9.06699
0.443848		0.945735	7.7527
7.75903		0.562696	4.34002
4.32801		2.34271	3.22678
2.7857		4.34059	1.66116
0.573848		0.784192	0.443848
		5.26579	0.497696
		7.78225	0.715
		6.69217	4.8137
		8.78965	3.09955
		5.53986	5.16734
		2.7825	3.08101
		0.822696	0.719192
		1.2745	1.79116
		8.24016	3.13762
		1.91001	8.89763
		5.68563	2.6292
		0.784619	7.16927
		4.00216	2.66728
		6.46982	3.42497
		3.08925	3.73939
		1.38496	5.99422
		2.31493	4.03051
		6.87773	4.91763
		4.0369	6.40753
		1.43924	1.68766
		0.562268	1.23266
		4.12463	6.16287
		6.45313	3.39343
		8.0669	3.81497
		1.82924	5.35182
		3.07539	4.63724
		1.3427	7.55941
		5.69544	8.15137
		8.24478	0.470772
		2.0057	5.63554
		2.60924	4.51058
		1.54885	4.577
		4.96558	4.20959
		7.18248	2.91151
		3.08335	0.481924
		5.04578	0.481924
		2.40032	1.17881
		3.523	2.49835
		0.811116	5.02447
		3.12328	6.73714
		5.80447	2.98113
		0.589192	5.15952
		3.89766	3.0354
		0.990772	3.068
		1.86689	6.14382
		0.757696	2.56378
		5.36425	1.72574
		3.26443	2.62963
		1.56881	1.98616
		2.93694	5.44602
		2.46027	7.13453
		4.02255	5.91771
		4.77038	3.69193
		0.681543	2.03305
		1.17462	6.6487
		5.26217	1.68347
		1.28885	1.48385
		4.56386	4.5314
		1.12958	4.95386
		4.85135	4.36566
		2.94682	3.24575
		5.03286	8.72437
		0.340772	4.81733
		2.43001	1.56462
		0.378848	2.59575
		0.340772	3.8917
		6.55421	1.13654
		0.730772	3.39066
		0.443848	0.367696
		4.02632	4.79893
		0.956888	3.13443
		2.06651	1.66074
		4.09309	0.891888
		1.47731	9.51226
		6.22453	0.757696
		0.665772	2.90178
		2.09258	2.59809
		5.02462	1.87193
		1.06039	8.96206
		6.02412	2.85027
		0.692696	2.10458
		5.39408	4.10381
		1.26654	1.57577
		2.34271	2.76801
		7.08771	3.56613
		0.497268	4.89156
		8.53342	4.25563
		9.40961	4.10943
		7.14817	3.80382
		0.378848	3.41154
		5.39451	0.975
		4.85412	0.329192
		0.91	1.13654
		4.7811	4.46455
		1.89424	3.10231
		3.98348	0.627696
		4.91259	5.26594
		4.26578	4.30762
		0.329192	4.37028
		0.329192	3.0842
		0.481924	5.21209
		0.562696	2.83116
		0.573848	1.95924
		4.54674	5.29648
		1.19039	4.68647
		3.56193	1.08689
		9.24579	3.31075
		0.600772	2.05578
		0.432696	4.86016
		0.394192	0.849619
		7.82175	0.604537
		4.74771	2.84459
		3.23189	5.71994
		0.551116	1.33154
		0.654619	3.01039
		1.64958	2.31493
		2.25731	0.64304
		8.72565	3.71233
		4.97333	0.876543
		1.50381	1.5377
		5.49667	6.8508
		1.73689	1.1477
		6.47906	4.30862
		8.05575	0.611924
		2.54843	6.96241
		6.88149	1.65001
		2.32608	1.21731
		3.17193	0.535772
		4.3425	0.589619
		2.48805	0.539537
		0.524619	0.329192
		5.48133	9.09349
		1.33616	0.455
		0.481924	0.665772
		3.26443	1.84501
		6.77337	4.08712
		1.4077	0.784619
		1.38958	3.66643
		4.84425	3.63951
		5.63597	6.18965
		5.20271	5.10525
		3.3675	0.443848
		5.21713	0.443848
		0.443848	3.55959
		3.66367	2.33113
		3.40039	4.66183
		3.66324	0.573848
		0.470772	0.70804
		5.51926	2.08185
		3.48912	0.378848
		4.64143	1.0827
		3.95755	2.79685
		1.82185	0.508848
		0.957315	3.18451
		2.65847	4.46497
		4.08755	4.62524
		6.17494	0.329192
		0.546924	2.05031
		6.66291	6.62426
		1.30462	0.941116
		0.876543	3.95464
		6.66162	1.84039
		8.79299	6.70837
		7.68947	0.757696
		6.58909	3.35997
		0.340772	8.65965
		6.94081	0.64304
		1.0827	2.34462
		8.43091	7.55856
		0.340772	7.28193
		4.59349	0.849619
		5.28256	7.30261
		5.03414	9.41849
		8.38217	8.89287
		0.600772	0.329192
		2.60271	4.79459
		4.64101	1.12496
		0.654619	5.90379
		4.2704	1.69924
		1.51539	8.56467
		5.34465	6.93619
		4.70224	2.75267
		5.03797	1.01031
		8.79527	3.75651
		8.72927	0.508848
		5.45341	5.23801
		1.13192	5.52998
		5.10162	2.57116
		2.55539	9.04788
		4.29733	6.70694
		1.94766	2.02424
		2.80381	0.741924
		4.88751	8.11521
		3.72028	5.7632
		5.53937	1.90958
		4.75104	4.14374
		7.73964	6.25394
		2.75558	4.84816
		6.28874	6.1532
		5.63768	0.508848
		4.83182	2.43378
		0.470772	7.75399
		3.03831	4.07731
		5.30344	1.86731
		0.562696	8.33294
		1.10962	8.23314
		4.73464	6.72599
		2.09848	5.35409
		7.2521	3.95151
		4.56343	6.82125
		0.719619	5.17635
		8.42452	6.66348
		5.91402	4.39535
		3.61955	7.30275
		1.58501	1.29347
		5.23248	6.08906
		3.49693	8.09753
		0.83804	7.00048
		0.546924	5.86351
		3.20028	7.13659
		1.61193	0.351924
		5.59647	4.84063
		7.66625	5.41405
		1.0177	1.00654
		0.746543	2.74486
		4.36886	4.34336
		4.7487	0.692696
		3.34839	3.20262
		3.51185	3.5922
		1.07154	5.24497
		2.20766	2.72575
			5.58192
			3.77271
			2.31535
			1.69838
			5.43253
			0.573848
			2.33347
			4.76405
			4.15674
			8.86538
			8.60871
			4.93155
			5.87971
			3.85348
			0.719619
			0.340772
			3.85724
			4.53516
			0.925772
			3.47925
			1.20154
			1.85574
			0.481924
			2.78989
			5.80213
			4.2552
			3.83913
			4.95337
			5.4902
			1.58501
			3.45104
			2.51078
			4.15674
			5.38564
			3.83266
			0.822696
			4.44004
			8.67052
			2.29958
			3.21839
			1.93608
			0.470772
			3.52848
			8.59003
			7.14292
			1.29304
			1.06692
			1.10962
			0.39
			0.367268
			8.33664
			5.99394
			3.5402
			3.88978
			3.38462
			0.719192
			4.52344
			0.799964
			1.82924
			2.02424
			8.76301
			1.04881
			2.16262
			1.20154
			1.30924
			5.78998
			3.11766
			2.93524
			1.71501
			0.604537
			2.9969
			3.20319
			3.29035
			5.43578
			1.38916
			0.654619
			0.768848
			1.71039
			2.96635
			1.39654
			3.22493
			2.46809
			6.01234
			1.56924
			2.46532
			1.10962
			1.33154
			5.24917
			4.02212
			2.97651
			0.784192
			5.45341
			5.20222
			1.12539
