# Supplementary figures and images for: Membrane binding properties of the cytoskeletal protein bactofilin
Source: eLife journal article supplement (doi:10.7554/elife.100749), 2024-11-13

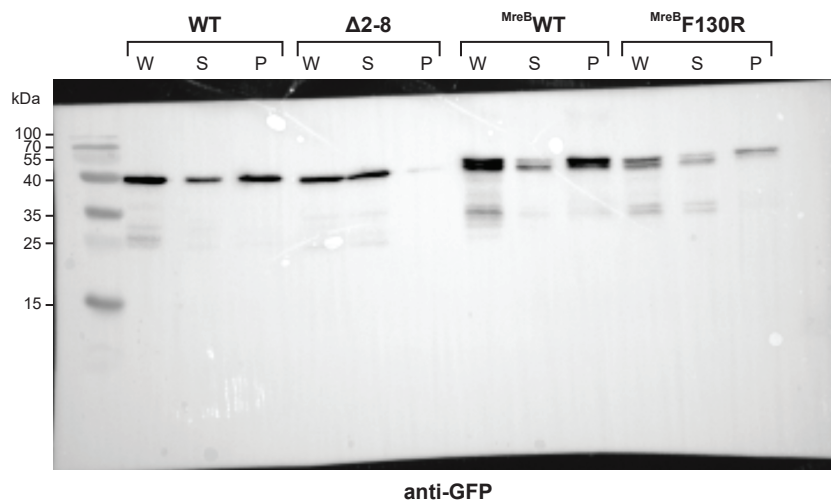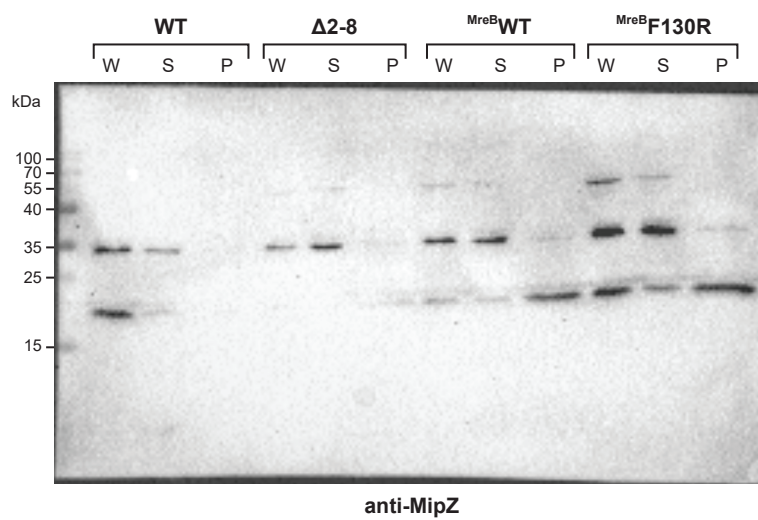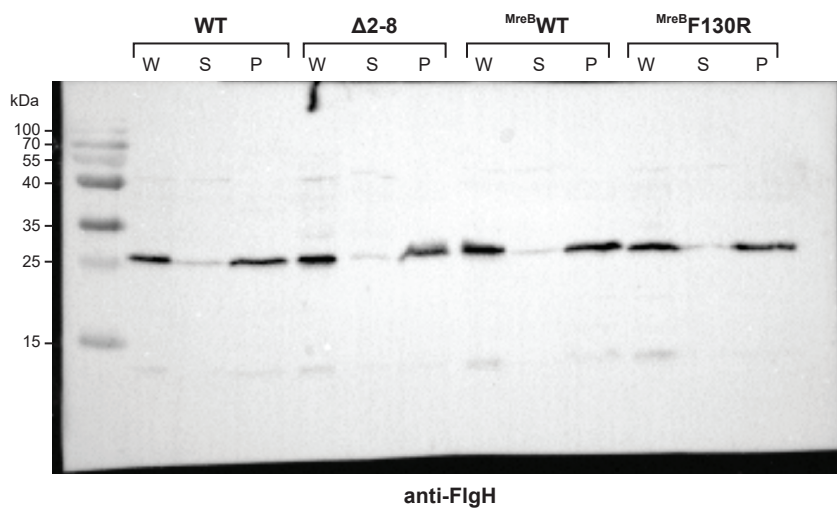

Supplement: fig2-data1 [file Figure 2B and Figure 4E-source data.pdf › Figure 2B and Figure 4E-source data.pdf]

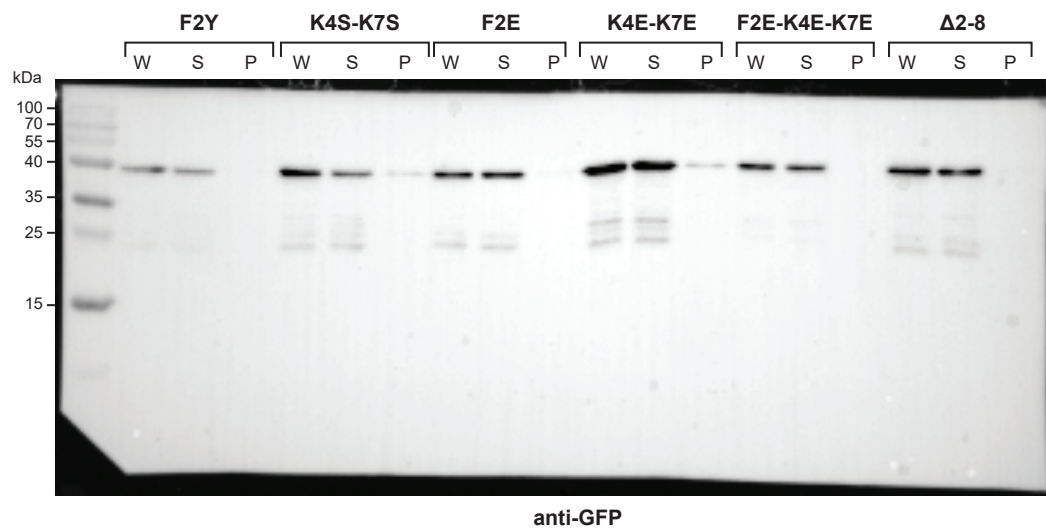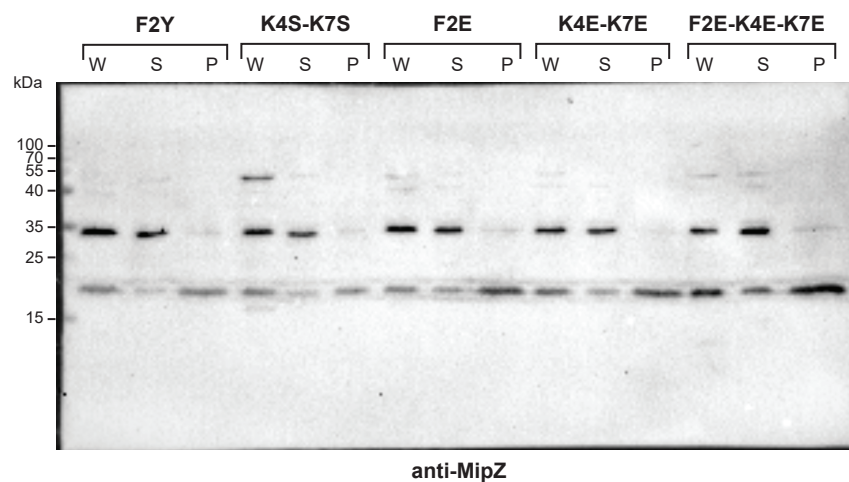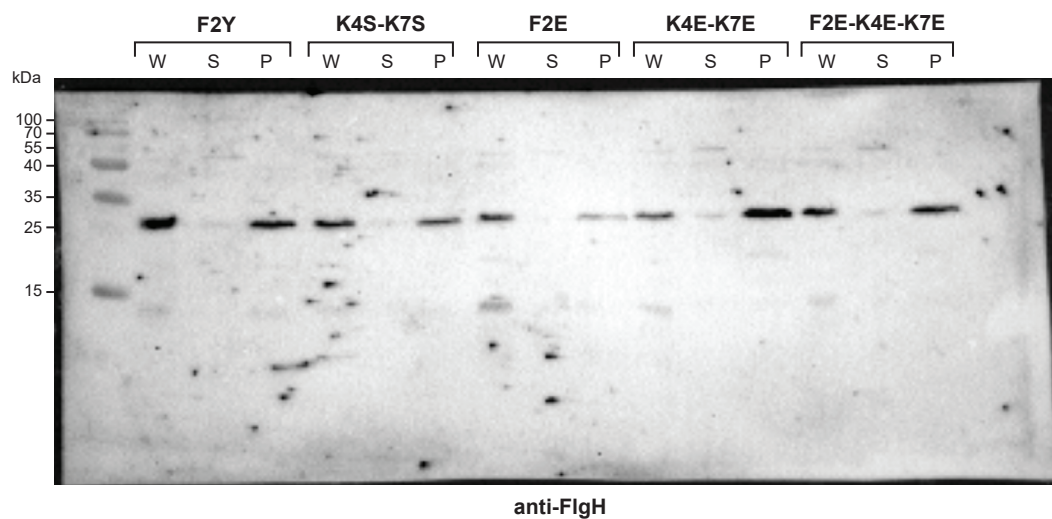

Supplement: fig2-data1 [file Figure 2C-source data.pdf › Figure 2C-source data.pdf]

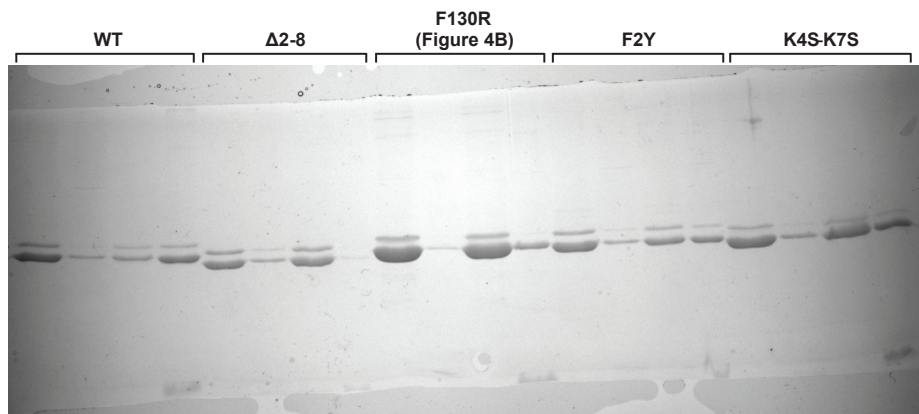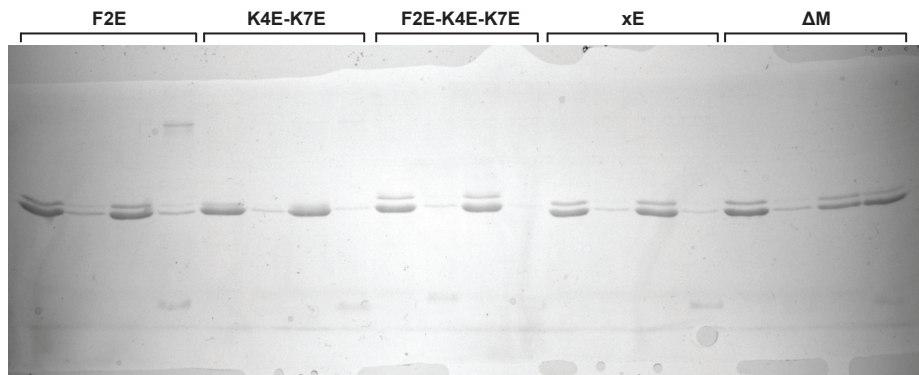

Supplement: fig3-data1 [file Figure 3-source data.pdf › Figure 3-source data.pdf]

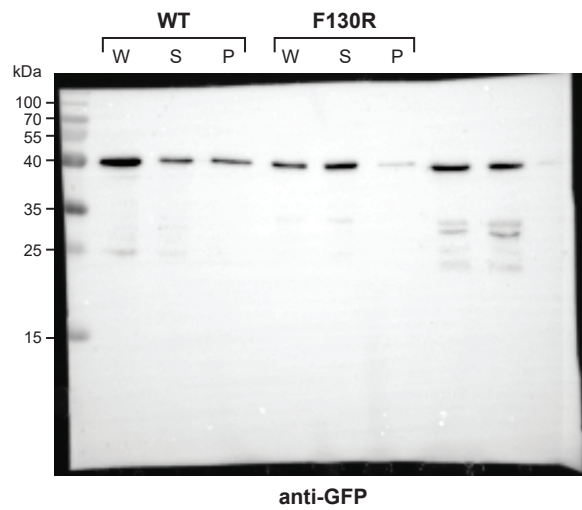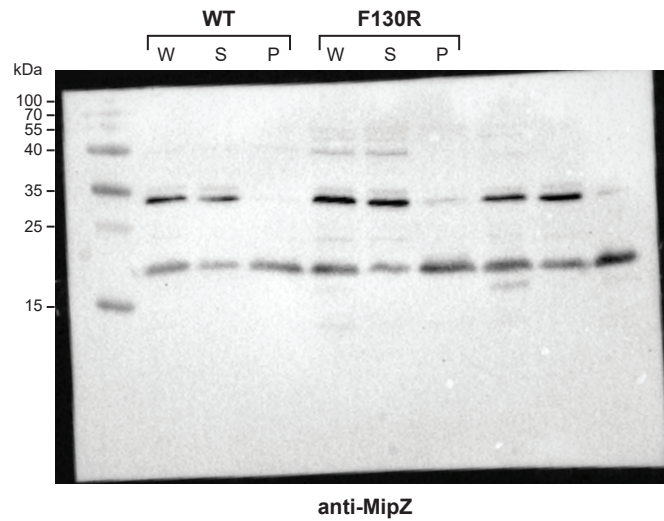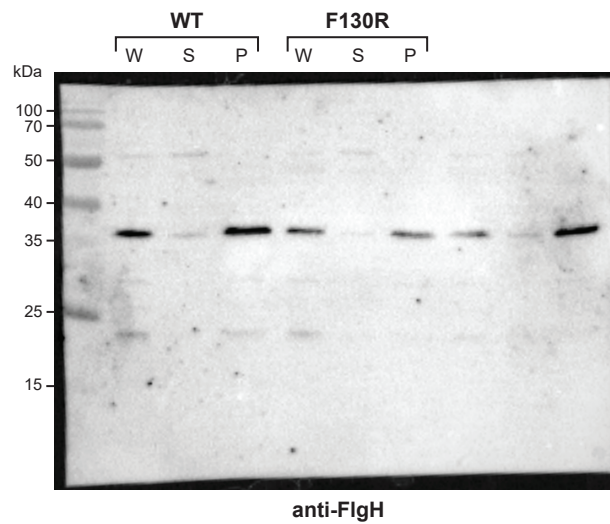

Supplement: fig4-data1 [file Figure 4A-source data.pdf › Figure 4A-source data.pdf]

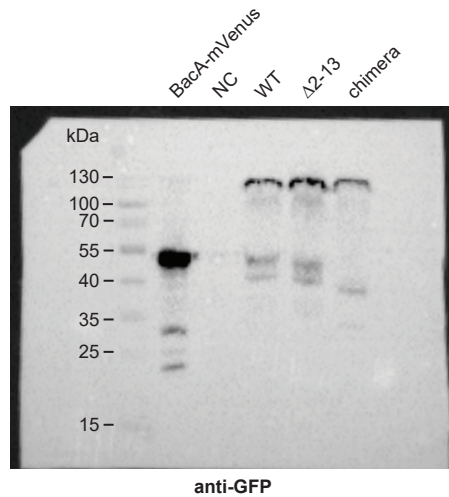

Supplement: fig8-figsupp3-data1 [file Figure 8-figure supplement 3-source data.pdf › Figure 8-figure supplement 3-source data.pdf]

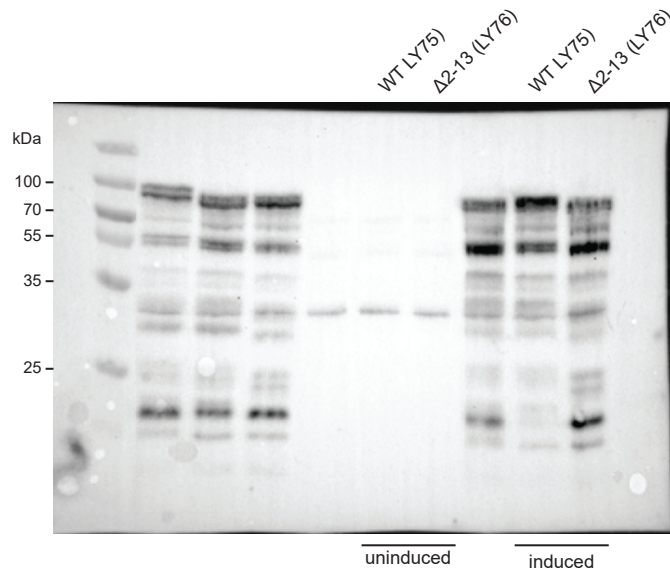

Supplement: fig8-figsupp4-data1 [file Figure 8-figure supplement 4C-source data.pdf › Figure 8-figure supplement 4C-source data.pdf]

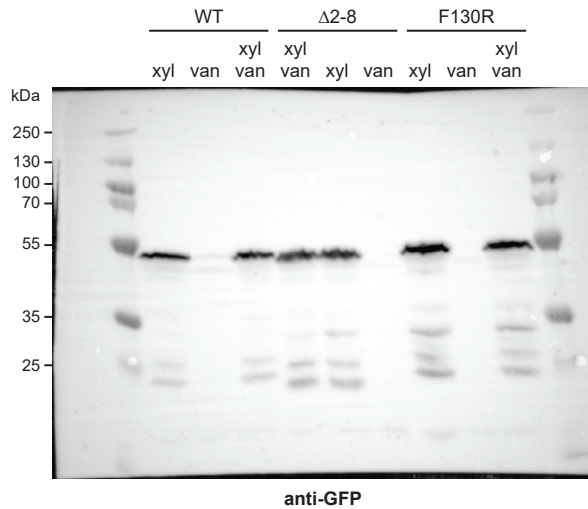

Supplement: fig9-figsupp1-data1 [file Figure 9-figure supplement 1A-source data.pdf › Figure 9-figure supplement 1A-source data.pdf]

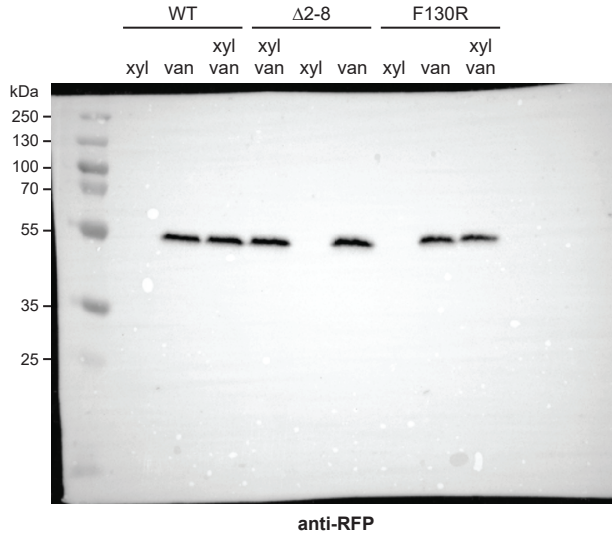

Supplement: fig9-figsupp1-data1 [file Figure 9-figure supplement 1B-source data.pdf › Figure 9-figure supplement 1B-source data.pdf]
